# Supplementary material for: Chemical Composition and Biological Activities of Gerbera anandria
Source: MDPI journal article supplement (doi:10.3390/molecules19044046), 2014-04-02
Supplement: s1 [file s1]

## Supplementary File

A new coumarin 8-methoxysmyrindiolc and eight other compounds were isolated from the 75% aqueous ethanol extract of the whole plants of *Gerbera anandria*. The structure of 8-methoxysmyrindiol (Figure S1) was supported by the HMBC correlations of H-4( $\delta$ 7.87) with C-8a, C-2, C-5; H-5( $\delta$ 7.31) with C-3', C-4, C-8a; H-3( $\delta$ 6.24) with C-4a; H-3'( $\delta$ 5.37) with C-5, C-7, C-6; OCH<sub>3</sub>( $\delta$ 4.05) with C-8; H-2''( $\delta$ 1.51) and H-3''( $\delta$ 1.47) with C-1'',C-2'.

**Figure S1.** The structure of 8-methoxysmyrindiol supported by the HMBC correlations.

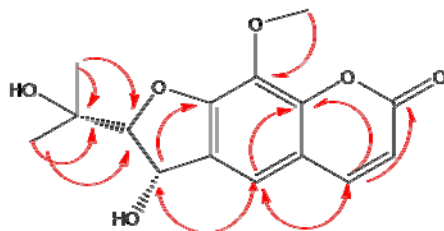

Free radical scavenging and cytotoxic activities of crude extracts and 8-methoxysmyrindiol were further investigated. The ethyl acetate phase exerted the strongest DPPH free radical scavenging activity in comparison to other fractions. Table S1 summarises IC<sub>50</sub>s of chloroform fraction and 8-methoxysmyrindiol against various human cancer cell lines. Coumarin 8-methoxysmyrindiol demonstrated cytotoxicity against multiple human cancer cell lines, with the highest potency in HepG2 cells.

**Table S1.** Cytotoxicity of chloroform fraction and 8-methoxysmyrindiol from *G. anandria* against various human cancer cell lines.

| Cell Line                        | IC <sub>50</sub> ( $\mu\text{g}\cdot\text{mL}^{-1}$ ) |                     |
|----------------------------------|-------------------------------------------------------|---------------------|
|                                  | Chloroform Fraction                                   | 8-Methoxysmyrindiol |
| HeLa (human cervical cancer)     | 60.0 $\pm$ 0.2                                        | >100                |
| MCF-7 (human breast cancer)      | >100                                                  | 50.1 $\pm$ 0.4      |
| HepG2 (Hepatocellular carcinoma) | 18.3 $\pm$ 0.3                                        | 5.3 $\pm$ 0.2       |
| HCT116 (human colon cancer)      | >100                                                  | 53.2 $\pm$ 0.3      |
| A549 (human lung adenocarcinoma) | >100                                                  | 25.1 $\pm$ 0.5      |
| A375-S2 (Human melanoma)         | 33.9 $\pm$ 0.4                                        | >100                |
| HT1080 (Human fibrosarcoma)      | 40.4 $\pm$ 0.2                                        | >100                |
| HL60 (Myeloid leukemia)          | 28.6 $\pm$ 0.3                                        | >100                |
